# Supplementary material for: Microemulsion-based synthesis of stacked calcium carbonate (calcite) superstructures
Source: Royal Society of Chemistry journal article supplement (doi:10.1039/b408041f), 2004-01-01
Supplement: b408041f.pdf [file b408041f.pdf]

**Diffraction patterns for these plate stacks gave double spots, sometimes faint rings too**

| TEM image                                                                                                                                         | Electron diffraction pattern                                                                                                                           | D spacings and associated miller indices                                                                             |                                                                                                    |
|---------------------------------------------------------------------------------------------------------------------------------------------------|--------------------------------------------------------------------------------------------------------------------------------------------------------|----------------------------------------------------------------------------------------------------------------------|----------------------------------------------------------------------------------------------------|
| 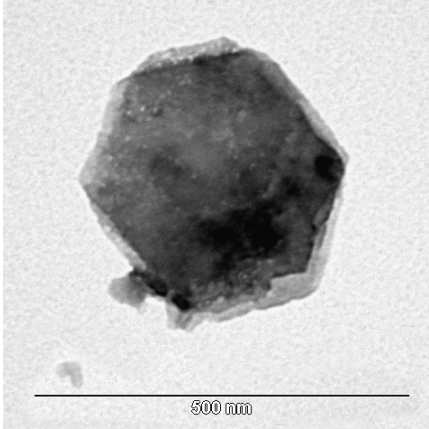 <p>1-46-2 5h b<br/>two lamellae</p>                             |  <p>Angular deviation btn spots = 8°</p>                             | A. 2.538<br>&<br>2.548<br>&<br>2.540                                                                                 | (110/120/210)                                                                                      |
|  <p>1-47-1 3h c; three lamellae</p>                             |                                                                     | A. 2.504<br>B. 2.548<br>C. 2.543                                                                                     | (110/120/210)                                                                                      |
|  <p>2-19-1 1h c (2733)<br/>two/three? Ill-defined lamellae</p> |  <p>Angular deviation:<br/>Between spots = 16°<br/>Of arc = 8°</p> | 1. 2.197<br>2. 2.496<br>3. 2.114<br>4. 1.670/<br>1.649<br>5. 1.629<br>&<br>1.662<br>6. 1.444<br>7. 1.459<br>8. 1.464 | -<br>(110/120/210)<br>(107) 2.117<br>-<br>(210) 1.633<br>&<br>(120) 1.633<br>(300) 1.440<br>-<br>- |

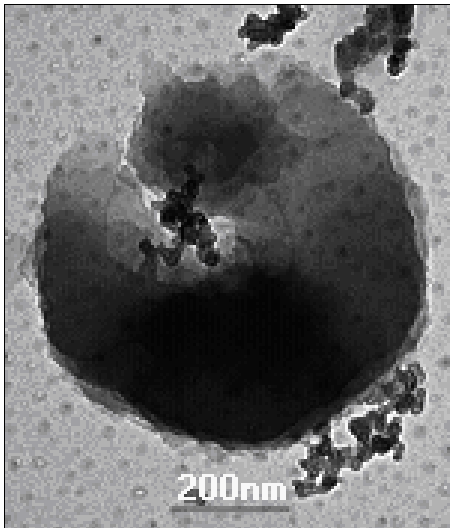

2-19-1 1h f

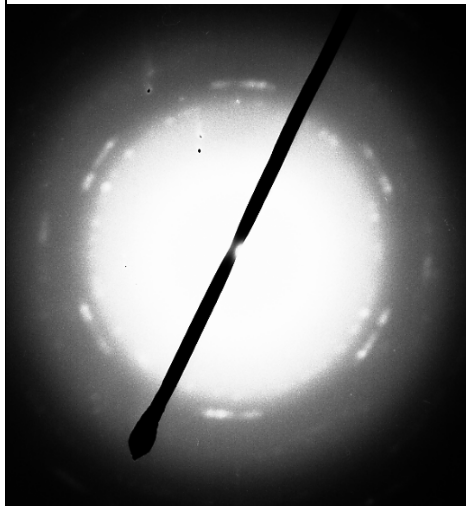

Angular deviation btn spots =  $13.5^\circ$   
(in inner ring)

|                                |               |
|--------------------------------|---------------|
| 1. 2.831                       | (006)         |
| 2. 2.470<br>& 2.509<br>& 2.521 | (110/120/210) |
| 3. 2.160                       | (200/220/020) |
| 4. 1.590                       | (212) 1.604   |
| 5. 1.435                       | (301) 1.435   |

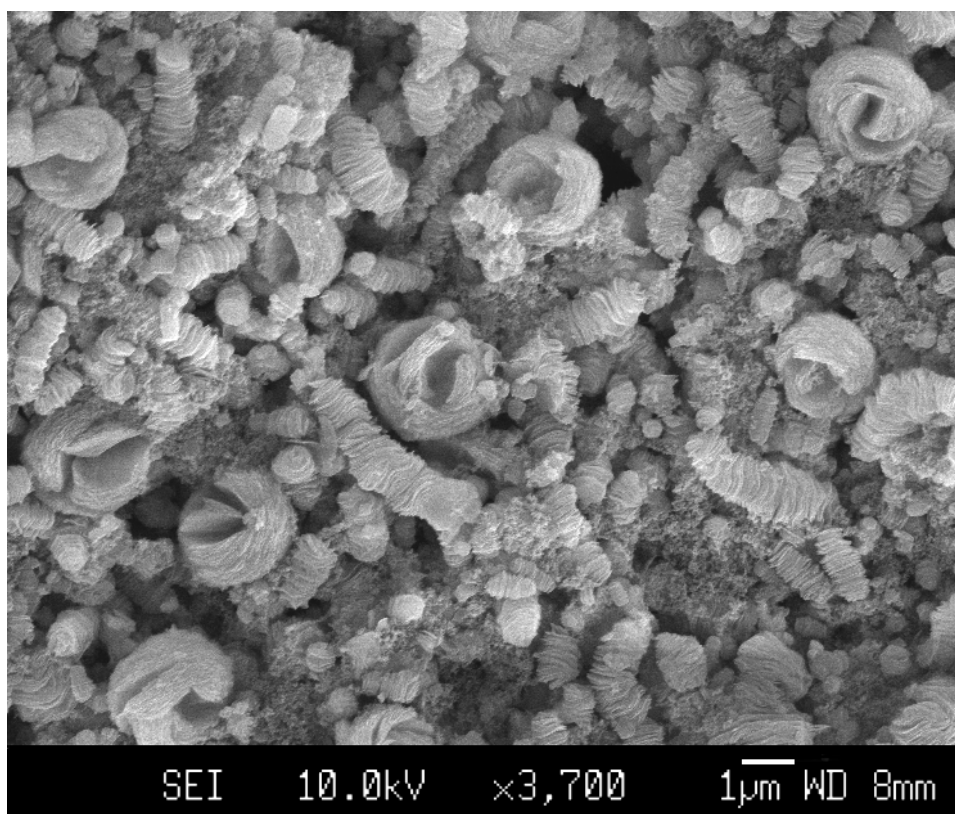

**Fig. 4**

SEM image of stacked lamellar structures of calcite and ring structures of aragonite, formed at  $w = 20$

### **Experimental methods**

† Carbonate-containing water-in-oil microemulsions were produced at  $w = 40$  and  $\text{pH} = 11.8$  by adding an appropriate amount of distilled water to microemulsion dispersions prepared at  $w = 20$ . The latter were typically prepared by addition of 72  $\mu\text{L}$  of aqueous  $\text{Na}_2\text{CO}_3$  (1 M) to 2 mL of a NaAOT/isooctane solution (0.1 M) followed by sonication in a water bath for 3 min. A dispersion of calcium-containing reverse micelles was prepared by dissolving dry calcium dodecylbenzenesulfonate in toluene (0.05 M) in the presence of *n*-butanol as a co-surfactant (surfactant : co-

surfactant molar ratio = 1 : 1). Coprecipitation was induced by adding 2 mL of the carbonate-containing microemulsion to 2 mL of the reverse micelle solution to give a pH of 11 and  $[\text{Ca}^{2+}] : [\text{CO}_3^{2-}]$  molar ratio of 1.4 : 1, followed by auto-vortexing for 10 s, after which the mixture was left to stand at room temperature for up to 2 weeks. Assuming homogeneous water exchange, the  $w$  value after mixing was calculated as  $\approx 25$ .

Samples were collected for electron microscopy, XRD and spectroscopic analysis between 30 min and 2 weeks after mixing of the reagents. Excess surfactants were removed by washing and centrifugation with ethanol, followed by at least three washings with a 1 : 1 mixture of aqueous NaCl (0.1 M) and ethanol.
